# Supplementary material for: The moderating role of gender in the association between quality of social relationships and sleep
Source: Springer Nature journal article supplement (doi:10.1007/s10865-022-00286-6), 2022-02-12
Supplement: MOESM1 [file 20128670]

## Supplemental Material

Table 1  
*Sociodemographic Characteristics of Participants*

|                                     | Global sleep score |          |      | Global sleep score and share bed |          |      | Daily diary and actigraphy |          |      | Daily diary and actigraphy and share bed |          |      |
|-------------------------------------|--------------------|----------|------|----------------------------------|----------|------|----------------------------|----------|------|------------------------------------------|----------|------|
|                                     | <i>M(SD)</i>       | <i>n</i> | %    | <i>M(SD)</i>                     | <i>n</i> | %    | <i>M(SD)</i>               | <i>n</i> | %    | <i>M(SD)</i>                             | <i>n</i> | %    |
| Gender                              |                    |          |      |                                  |          |      |                            |          |      |                                          |          |      |
| Male                                |                    | 624      | 52   |                                  | 516      | 52.2 |                            | 168      | 50   |                                          | 141      | 50   |
| Female                              |                    | 575      | 48   |                                  | 473      | 47.8 |                            | 168      | 50   |                                          | 141      | 50   |
| Marital status                      |                    |          |      |                                  |          |      |                            |          |      |                                          |          |      |
| Married                             |                    | 1110     | 92.6 |                                  | 945      | 95.6 |                            | 318      | 94.6 |                                          | 272      | 96.5 |
| Separated                           |                    | 13       | 1.1  |                                  | 2        | .2   |                            | 1        | .3   |                                          | 1        | .4   |
| Divorced                            |                    | 43       | 3.6  |                                  | 20       | 2.0  |                            | 10       | 3.0  |                                          | 4        | 1.4  |
| Widowed                             |                    | 4        | .3   |                                  | 2        | .3   |                            | 0        | 0    |                                          | 0        | 0    |
| Never married                       |                    | 29       | 2.4  |                                  | 19       | 1.9  |                            | 7        | 2.1  |                                          | 5        | 1.8  |
| Age                                 | 53.84<br>(12.28)   |          |      | 52.95<br>(12.13)                 |          |      | 52.46<br>(12.19)           |          |      | 51.25<br>(11.98)                         |          |      |
| Share bed with partner <sup>a</sup> |                    | 989      | 82.5 |                                  | 989      | 100  |                            | 282      | 83.9 |                                          | 282      | 100  |
| Highest level of education          |                    |          |      |                                  |          |      |                            |          |      |                                          |          |      |
| < high school                       |                    | 29       | 2.4  |                                  | 20       | 2    |                            | 13       | 3.9  |                                          | 11       | 3.9  |
| GED or graduated from high school   |                    | 208      | 17.3 |                                  | 168      | 17   |                            | 66       | 19.6 |                                          | 53       | 18.8 |
| Some college                        |                    | 326      | 27.2 |                                  | 262      | 26.5 |                            | 100      | 29.8 |                                          | 81       | 28.7 |
| Bachelor's degree                   |                    | 308      | 25.7 |                                  | 253      | 25.6 |                            | 84       | 25   |                                          | 73       | 25.9 |

Supplemental Material

|                                         |               |      |               |      |               |      |               |      |
|-----------------------------------------|---------------|------|---------------|------|---------------|------|---------------|------|
| Some graduate school or graduate degree | 326           | 27.2 | 284           | 28.7 | 73            | 21.7 | 64            | 22.7 |
| Employment status                       |               |      |               |      |               |      |               |      |
| Currently employed                      | 659           | 55   | 558           | 56.4 | 184           | 54.8 | 165           | 58.5 |
| Not employed                            | 540           | 45   | 431           | 43.6 | 152           | 45.2 | 117           | 41.5 |
| Number of health events                 | .96<br>(1.24) |      | .96<br>(1.25) |      | .79<br>(1.07) |      | .75<br>(1.04) |      |
| 0                                       | 619           | 51.6 | 516           | 52.2 | 182           | 54.2 | 157           | 55.7 |
| 1                                       | 263           | 21.9 | 206           | 20.8 | 83            | 24.7 | 68            | 24.1 |
| 2                                       | 141           | 11.8 | 119           | 12   | 42            | 12.5 | 35            | 12.4 |
| 3                                       | 100           | 8.3  | 86            | 8.7  | 17            | 5.1  | 14            | 5    |
| 4                                       | 76            | 6.3  | 62            | 6.3  | 12            | 3.6  | 8             | 2.8  |

*Note:* <sup>a</sup> Reflects the number and percentage of participants answering “yes” to this question.

Table 2

*Means, standard deviations and correlations between social variables and clinical sleep disturbance*

|                               | M(SD)      | Correlations  |               |               |               |              |              |              |             |   |
|-------------------------------|------------|---------------|---------------|---------------|---------------|--------------|--------------|--------------|-------------|---|
|                               |            | 1             | 2             | 3             | 4             | 5            | 6            | 7            | 8           | 9 |
| Perceived support             |            |               |               |               |               |              |              |              |             |   |
| 1. Total                      | 3.49 (.42) | 1             |               |               |               |              |              |              |             |   |
| 2. Partner                    | 3.64 (.51) | <b>.66**</b>  | 1             |               |               |              |              |              |             |   |
| 3. Family                     | 3.52 (.59) | <b>.78**</b>  | <b>.31**</b>  | 1             |               |              |              |              |             |   |
| 4. Friends                    | 3.32 (.61) | <b>.75**</b>  | <b>.21**</b>  | <b>.37**</b>  | 1             |              |              |              |             |   |
| Perceived strain              |            |               |               |               |               |              |              |              |             |   |
| 5. Total                      | 1.97 (.42) | <b>-.41**</b> | <b>-.43**</b> | <b>-.33**</b> | <b>-.17**</b> | 1            |              |              |             |   |
| 6. Partner                    | 2.13 (.61) | <b>-.46**</b> | <b>-.65**</b> | <b>-.25**</b> | <b>-.15**</b> | <b>.73**</b> | 1            |              |             |   |
| 7. Family                     | 2.00 (.58) | <b>-.27**</b> | <b>-.15**</b> | <b>-.34**</b> | <b>-.10**</b> | <b>.78**</b> | <b>.29**</b> | 1            |             |   |
| 8. Friends                    | 1.77 (.48) | <b>-.17**</b> | <b>-.11**</b> | <b>-.14**</b> | <b>-.12**</b> | <b>.74**</b> | <b>.28**</b> | <b>.48**</b> | 1           |   |
| 9. Clinical sleep disturbance | 5.45(3.14) | <b>-.11**</b> | <b>-.08*</b>  | <b>-.10**</b> | -0.06         | <b>.14**</b> | <b>.08**</b> | <b>.16**</b> | <b>.06*</b> | 1 |

Note: †  $p < .10$ .\*  $p < .05$ .\*\*  $p < .01$ .



Supplemental Material

|                                    |                   |                       |                       |                       |                       |                  |                   |                  |                  |                  |                  |      |                       |                       |   |
|------------------------------------|-------------------|-----------------------|-----------------------|-----------------------|-----------------------|------------------|-------------------|------------------|------------------|------------------|------------------|------|-----------------------|-----------------------|---|
| 9. Sleep disturbance               | 2.36<br>(.70)     | -<br><b>.24*</b><br>* | -<br><b>.17*</b><br>* | -<br><b>.19*</b><br>* | -<br><b>.17*</b><br>* | <b>.17*</b><br>* | <b>.16*</b><br>*  | .11 <sup>†</sup> | .11 <sup>†</sup> | 1                |                  |      |                       |                       |   |
| 10. Light sleep                    | 2.22<br>(.67)     | -<br><b>.21*</b><br>* | -<br><b>.14*</b><br>* | -<br><b>.17*</b><br>* | -<br><b>.16*</b><br>* | <b>.20*</b><br>* | .10 <sup>†</sup>  | <b>.18*</b><br>* | <b>.16*</b><br>* | <b>.84*</b><br>* | 1                |      |                       |                       |   |
| 11. Less-rest                      | 2.37<br>(.68)     | -<br><b>.25*</b><br>* | -<br><b>.23*</b><br>* | -<br><b>.19*</b><br>* | -<br><b>.13*</b><br>* | <b>.21*</b><br>* | <b>.24*</b><br>*  | <b>.13*</b><br>* | .08              | <b>.85*</b><br>* | <b>.67*</b><br>* | 1    |                       |                       |   |
| Actigraphy measured sleep outcomes |                   |                       |                       |                       |                       |                  |                   |                  |                  |                  |                  |      |                       |                       |   |
| 12. Sleep efficiency               | 83.45<br>(7.56)   | .005                  | .03                   | .03                   | -.05                  | -.06             | -<br>.13*         | .01              | -.01             | -.04             | -.07             | -.01 | 1                     |                       |   |
| 13. Sleep onset latency            | 22.65<br>(19.51)  | -<br>.001             | .004                  | -.05                  | .05                   | .03              | .03               | .03              | .01              | -.01             | .01              | -.01 | -<br><b>.73*</b><br>* | 1                     |   |
| 14. Sleep time                     | 386.25<br>(62.38) | 0.00                  | .02                   | 0.00                  | -.02                  | .01              | -.11 <sup>†</sup> | .07              | .09              | .01              | -.01             | .02  | <b>.59*</b><br>*      | -<br><b>.35*</b><br>* | 1 |

Note: †  $p < .10$ .

\*  $p < .05$ .

\*\*  $p < .01$ .

Table 7

*Adjusted estimates predicting daily sleep disturbance from different sources of perceived social support and total social strain*

|                            | Daily sleep disturbance |          |           |           |
|----------------------------|-------------------------|----------|-----------|-----------|
|                            | <i>b</i> ( <i>SE</i> )  | <i>p</i> | 95% CI    |           |
|                            |                         |          | <i>LL</i> | <i>UL</i> |
| Support from partner       | -.12 (.09)              | .21      | -.37      | .09       |
| Support from family        | -.10 (.07)              | .18      | -.27      | .06       |
| Support from friends       | -.09 (.07)              | .21      | -.23      | .06       |
| Total perceived strain     | .15 (.12)               | .19      | -.11      | .38       |
| <i>R</i> <sup>2</sup>      | .10                     |          |           |           |
| Adj. <i>R</i> <sup>2</sup> | .07                     |          |           |           |
| F                          | 2.8                     | .001     |           |           |

*Note:* Adjusted for major health events, age, employment status, number of caffeinated drinks, number of alcoholic drinks, minutes of moderate or vigorous exercise, and length of nap time (minutes)

Table 8

*Adjusted estimates predicting clinical sleep disturbance and subjective daily sleep outcomes from different sources of perceived social support and strain*

|                            | PSQI          |          |           |           | Light sleep   |          |           |           | Less rest     |          |           |           |
|----------------------------|---------------|----------|-----------|-----------|---------------|----------|-----------|-----------|---------------|----------|-----------|-----------|
|                            | <i>b(SE)</i>  | <i>p</i> | 95% CI    |           | <i>b(SE)</i>  | <i>p</i> | 95% CI    |           | <i>b(SE)</i>  | <i>p</i> | 95% CI    |           |
|                            |               |          | <i>LL</i> | <i>UL</i> |               |          | <i>LL</i> | <i>UL</i> |               |          | <i>LL</i> | <i>UL</i> |
| Support from partner       | -.17<br>(.26) | .53      | -.69      | .33       | -.12<br>(.10) | .26      | -.41      | .14       | -.14<br>(.10) | .16      | -.45      | .12       |
| Support from family        | -.18<br>(.19) | .35      | -.53      | .17       | -.07<br>(.08) | .32      | -.24      | .09       | -.08<br>(.07) | .30      | -.25      | .08       |
| Support from friends       | -.12<br>(.17) | .50      | -.46      | .24       | -.10<br>(.07) | .15      | -.25      | .05       | -.05<br>(.07) | .45      | -.20      | .11       |
| Strain from partner        | .11 (.22)     | .61      | -.34      | .57       | -.03<br>(.09) | .72      | -.23      | .14       | .16 (.09)     | .056     | -.03      | .34       |
| Strain from family         | .71 (.21)     | .001     | .31       | 1.11      | .13 (.09)     | .13      | -.05      | .33       | .03 (.09)     | .72      | -.13      | .21       |
| Strain from friends        | -.13<br>(.24) | .59      | -.58      | .35       | .13 (.09)     | .18      | -.07      | .31       | .02 (.09)     | .83      | -.17      | .20       |
| <i>R</i> <sup>2</sup>      | .04           |          |           |           | .07           |          |           |           | .14           |          |           |           |
| Adj. <i>R</i> <sup>2</sup> | .03           |          |           |           | .03           |          |           |           | .10           |          |           |           |
| F                          | 4.26          | <.001    |           |           | 1.70          | .06      |           |           | 3.42          | <.001    |           |           |

*Note:* Adjusted for major health events, age, employment status, number of caffeinated drinks, number of alcoholic drinks, minutes of moderate or vigorous exercise, and length of nap time (minutes)
